# Supplementary material for: Exploring improved strategies for therapeutic studies and biological activities of novel zinc and indium phthalocyanines
Source: Royal Society of Chemistry journal article supplement (doi:10.1039/d4dt02261k), 2024-01-01
Supplement: d4dt02261k1.pdf [file d4dt02261k1.pdf]

## Supplementary Material

### Exploring improved strategies for therapeutic studies and biological activities of novel zinc and indium phthalocyanines

Kevser Celep<sup>a</sup>, Göknur Yaşa Atmaca<sup>a</sup>, Pelin Demir Aydoğmuş<sup>a</sup>, Kumsal Eroğlu<sup>a</sup>, Ömer Tahir Günkara<sup>a</sup>, Gülay Giray<sup>b</sup>, Gülşah Tollu<sup>c</sup>, Sadin Özdemir<sup>d</sup>, Ali Erdoğan<sup>a</sup>

#### 1. Photochemical Studies

##### 1.1 Singlet oxygen quantum yields ( $\Phi_{\Delta}$ )

Singlet oxygen efficiency was determined in air (no oxygen bubbled) using their relative method (Eq. 1) with unsubstituted ZnPc (in organic solvent) as reference and 1,3-Diphenylisobenzofuran (DPBF) (in organic solvent) as chemical quenchers for singlet oxygen,

$$\Phi_{\Delta} = \Phi_{\Delta}^{\text{Std}} \frac{R \cdot I_{\text{abs}}^{\text{Std}}}{R^{\text{Std}} \cdot I_{\text{abs}}} \quad (1)$$

where is the singlet oxygen quantum yield for the Standard ZnPc ( $\Phi_{\Delta}=0.67$  in DMSO) [6,37].  $R$  and  $R_{\text{Std}}$  are the DPBF photo bleaching rates in the presence of the respective samples and standard, respectively.  $I_{\text{abs}}$  and  $I_{\text{abs}}^{\text{Std}}$  are the rates of light absorption by the sample and standard, respectively. The samples containing DPBF were prepared in the dark and irradiated at the Q band region. The absorption band of the DPBF reduced by light irradiation (The light intensity of  $7.05 \times 10^{15}$  photons  $\text{s}^{-1} \text{cm}^{-2}$ ). The degradation of DPBF was monitored using UV-Vis spectroscopy after each 5 s light irradiation at 417 nm for PDT.

##### 1.2 Photodegradation quantum yields ( $\Phi_{\text{d}}$ )

Photodegradation quantum yields were determined using Eq. 2 [6],

$$\Phi_{\text{d}} = \frac{(C_0 - C_t) \cdot V \cdot N_A}{I_{\text{abs}} \cdot S \cdot t} \quad (2)$$

where “ $C_0$ ” and “ $C_t$ ” are the sample concentrations before and after irradiation respectively, “ $V$ ” is the reaction volume, “ $N_A$ ” is the Avogadro’s constant, “ $S$ ” is the irradiated cell area, “ $t$ ” is the irradiation time, “ $I_{abs}$ ” is the overlap integral of the radiations of light intensity and the absorption of the sample. A light intensity of  $2.42 \times 10^{16}$  photons  $s^{-1} cm^{-2}$  was employed to determinate the photodegradation. The degradation of max. Q band was monitored after each 5 minute irradiation.

## 2. Confirmation of Structure

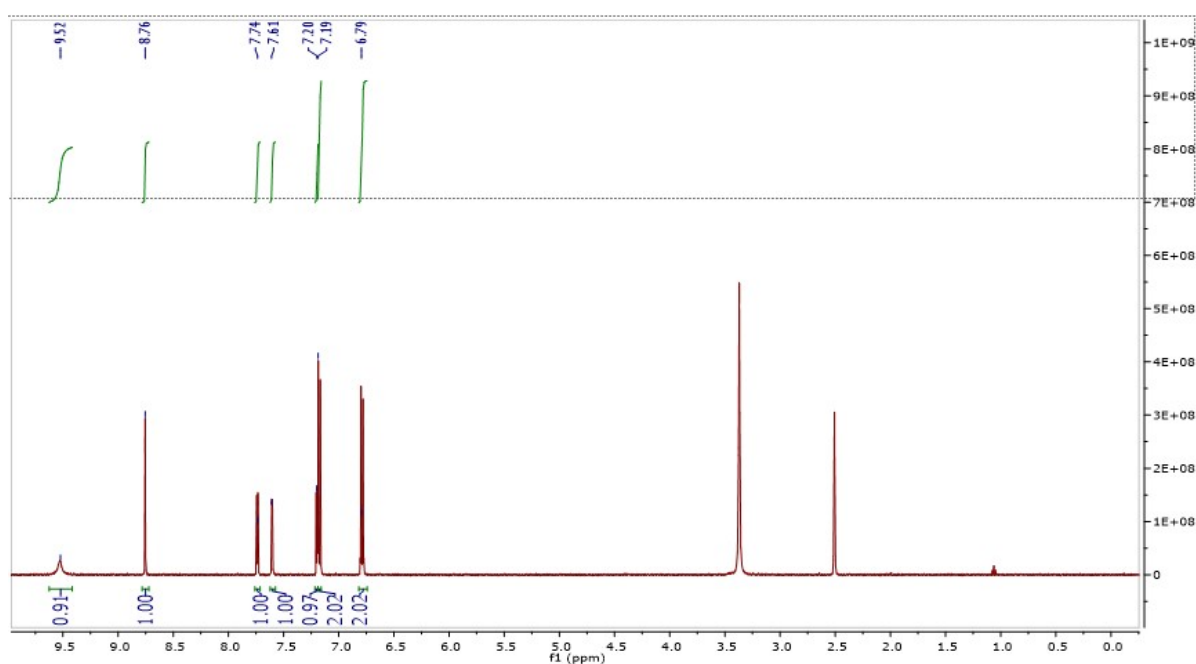

Figure S1.  $^1H$ -NMR spectra of compound D1

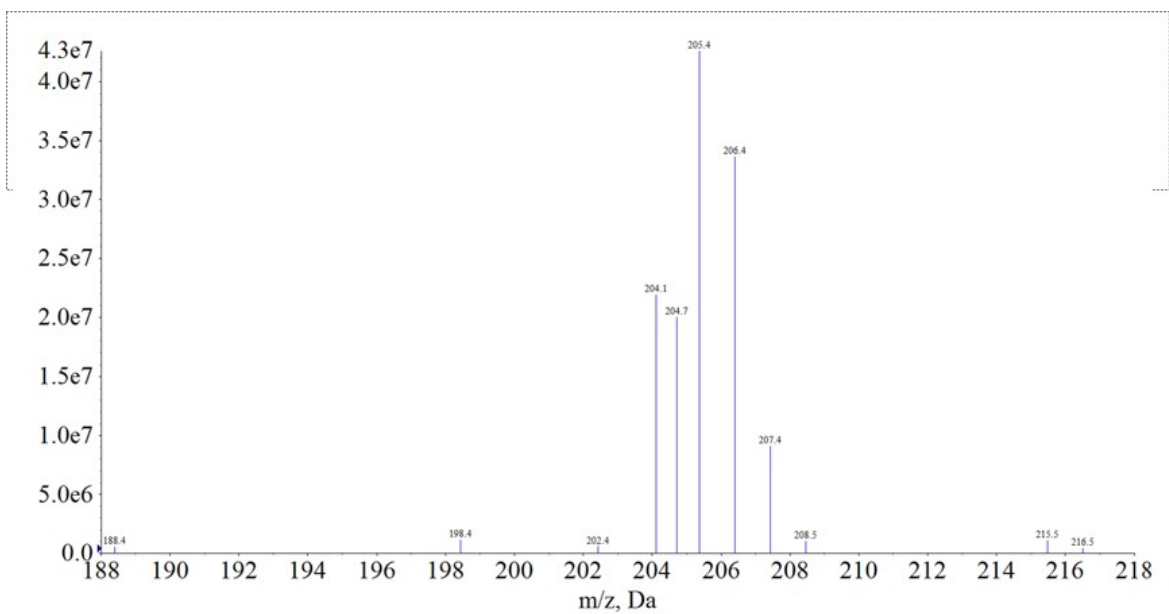

**Figure S2.** Mass spectra of compound D1

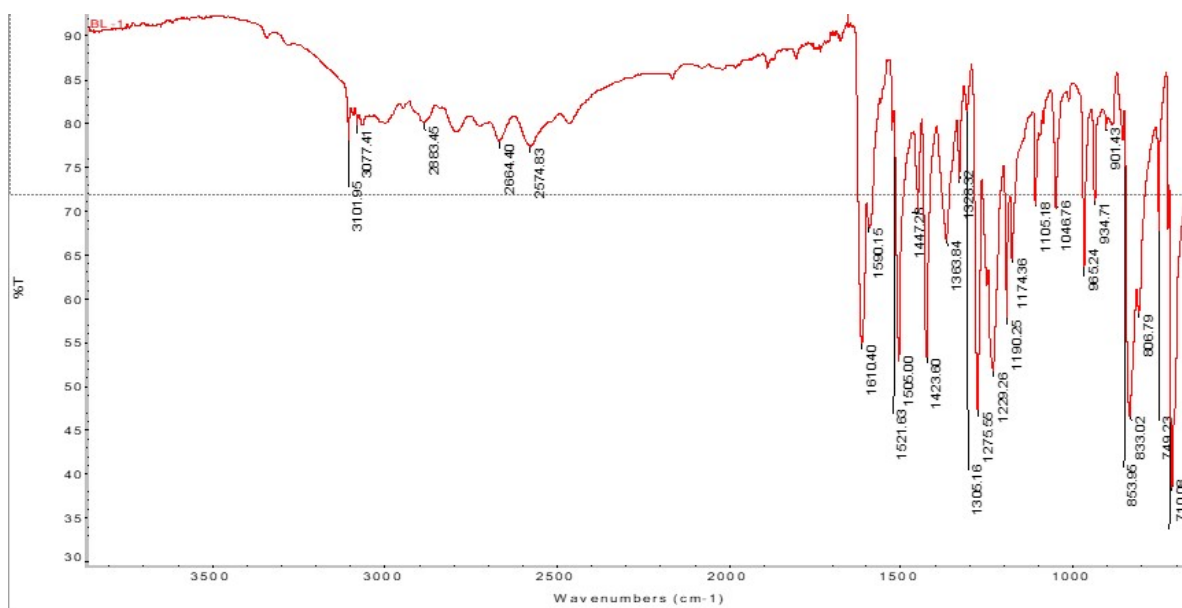

**Figure S3.** FT-IR spectra of compound D1

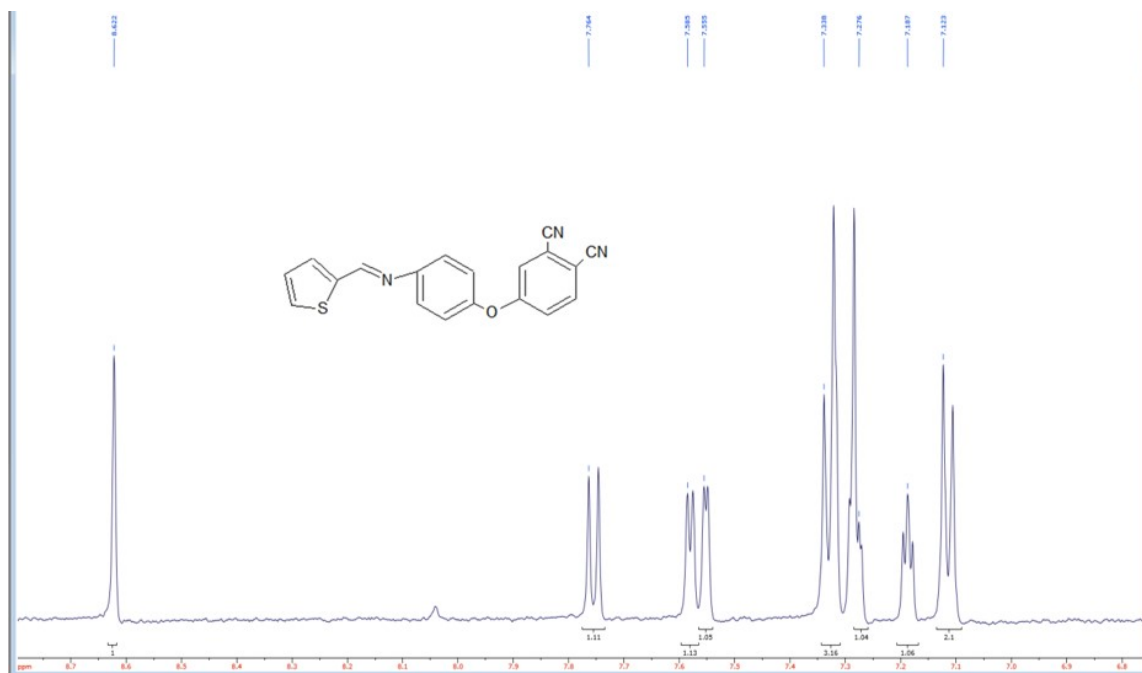

**Figure S4.** <sup>1</sup>H-NMR spectra of compound D2

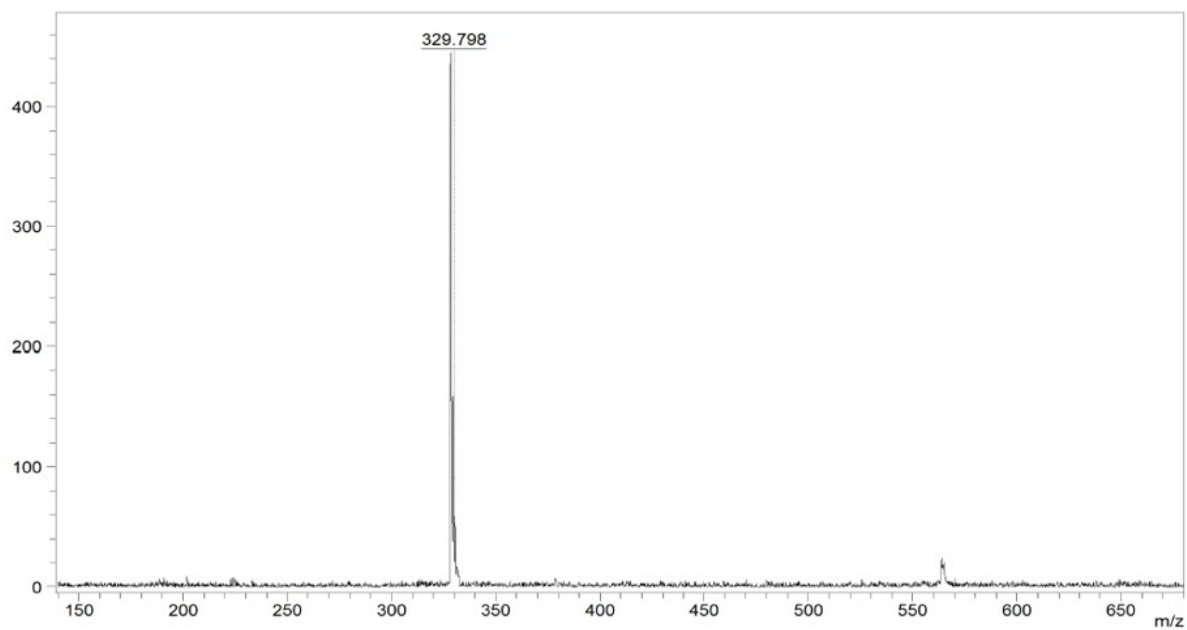

**Figure S5.** Mass spectra of compound D2

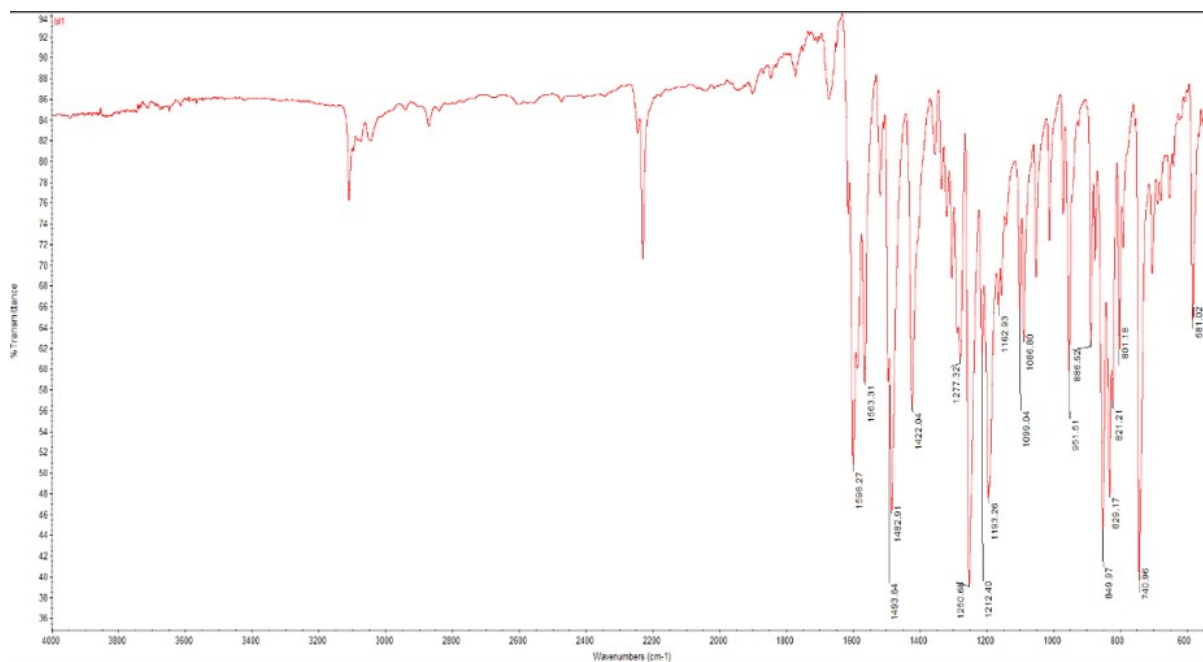

**Figure S6.** FT-IR spectra of compound D2

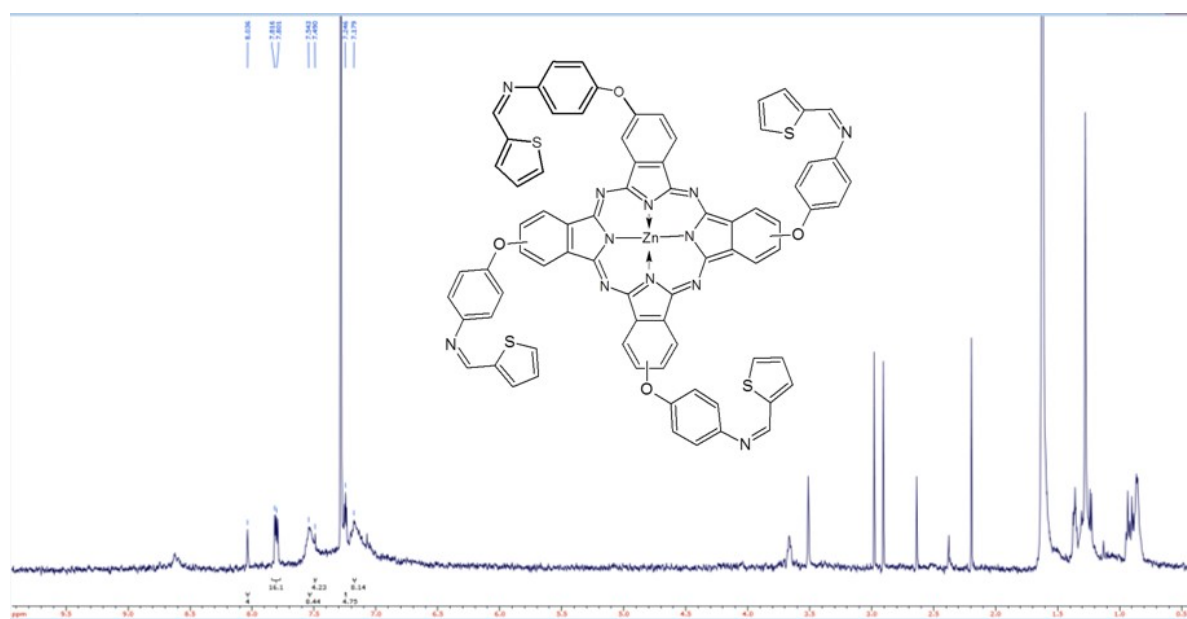

**Figure S7.** <sup>1</sup>H-NMR spectra of compound D3

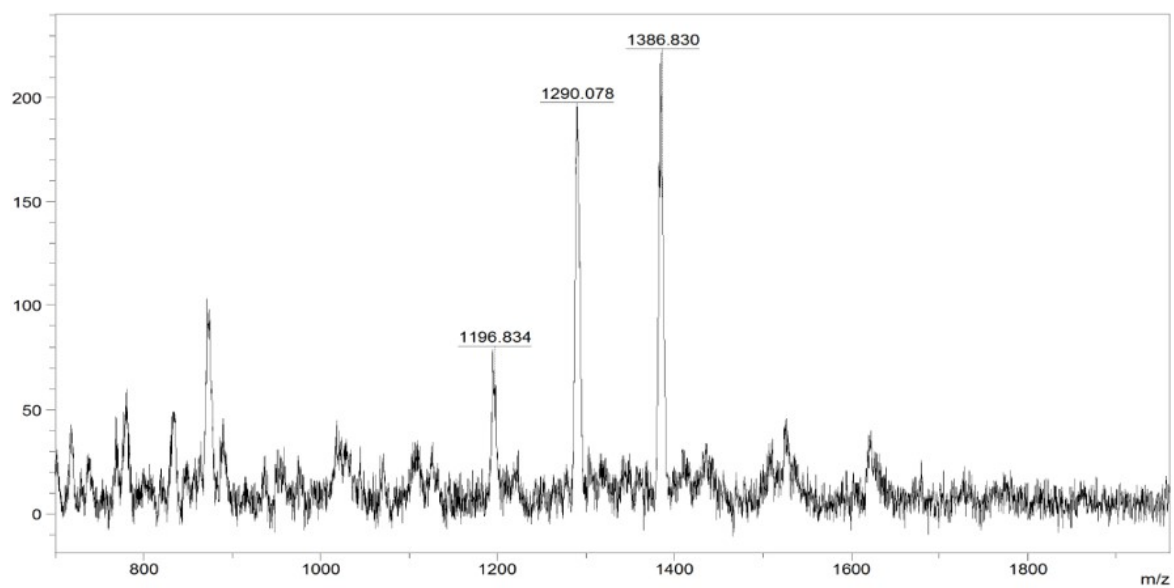

**Figure S8.** Mass spectra of compound D3

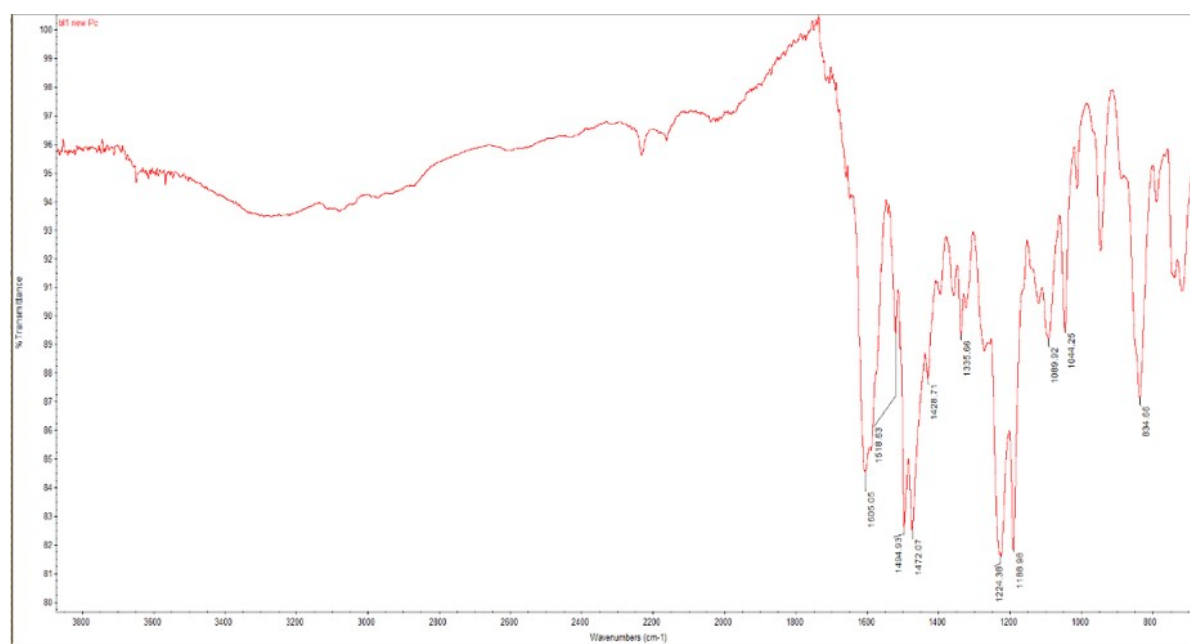

**Figure S9.** FT-IR spectra of compound D3

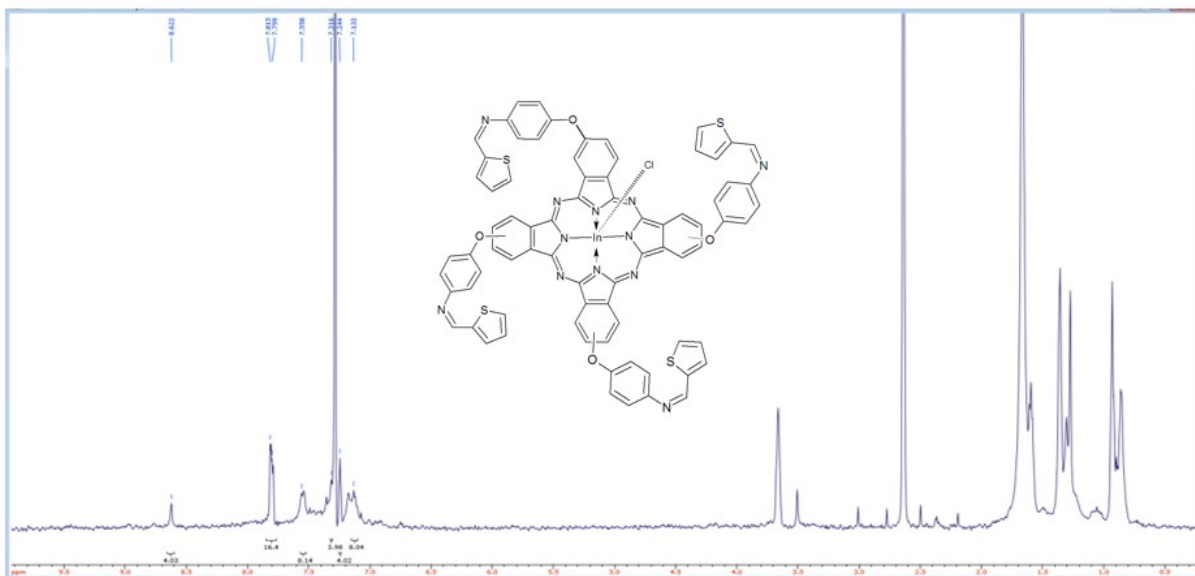

**Figure S10.** <sup>1</sup>H-NMR spectra of compound **D4**

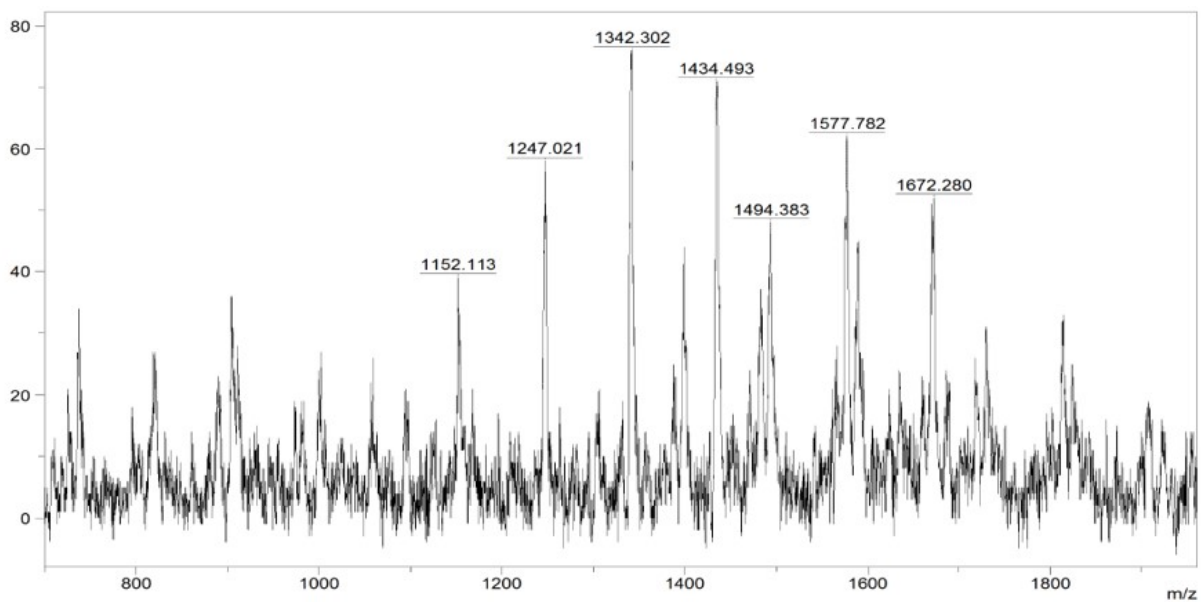

**Figure S11.** Mass spectra of compound **D4**

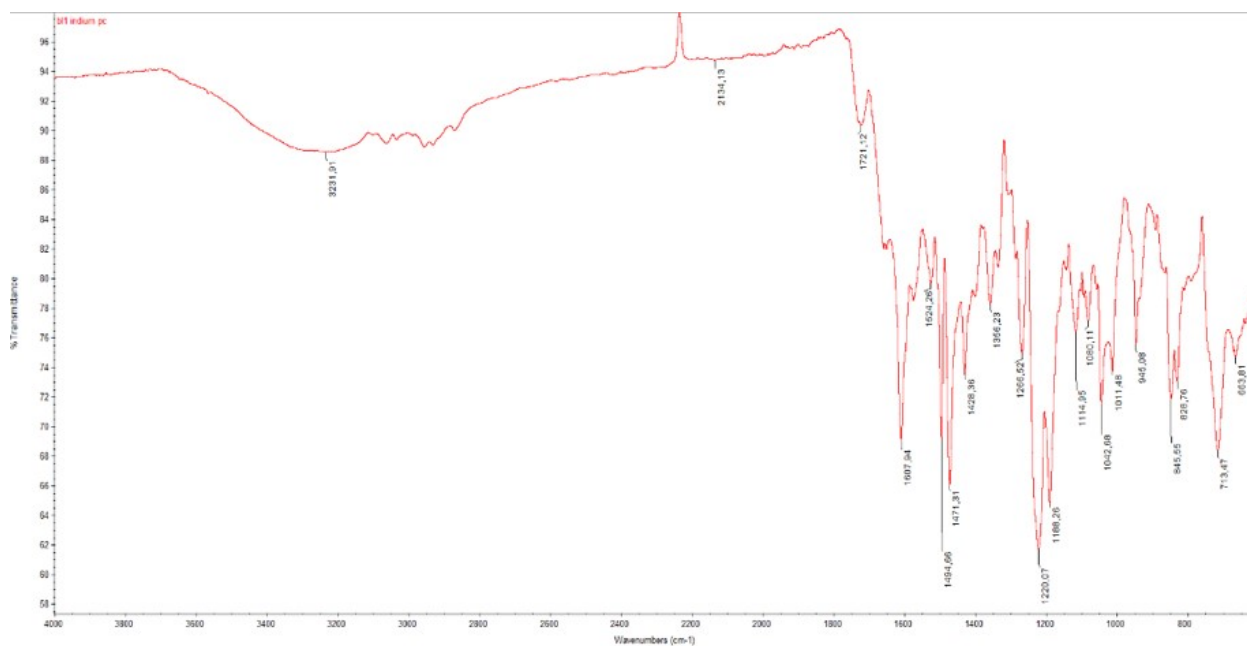

Figure S12. FT-IR spectra of compound D4
